# Supplementary material for: Zbtb7a is a transducer for the control of promoter accessibility by NF-kappa B and multiple other transcription factors
Source: PubMed Central journal article supplement (PMC5993293; doi:10.1371/journal.pbio.2004526), 2018-05-29

Figure S7

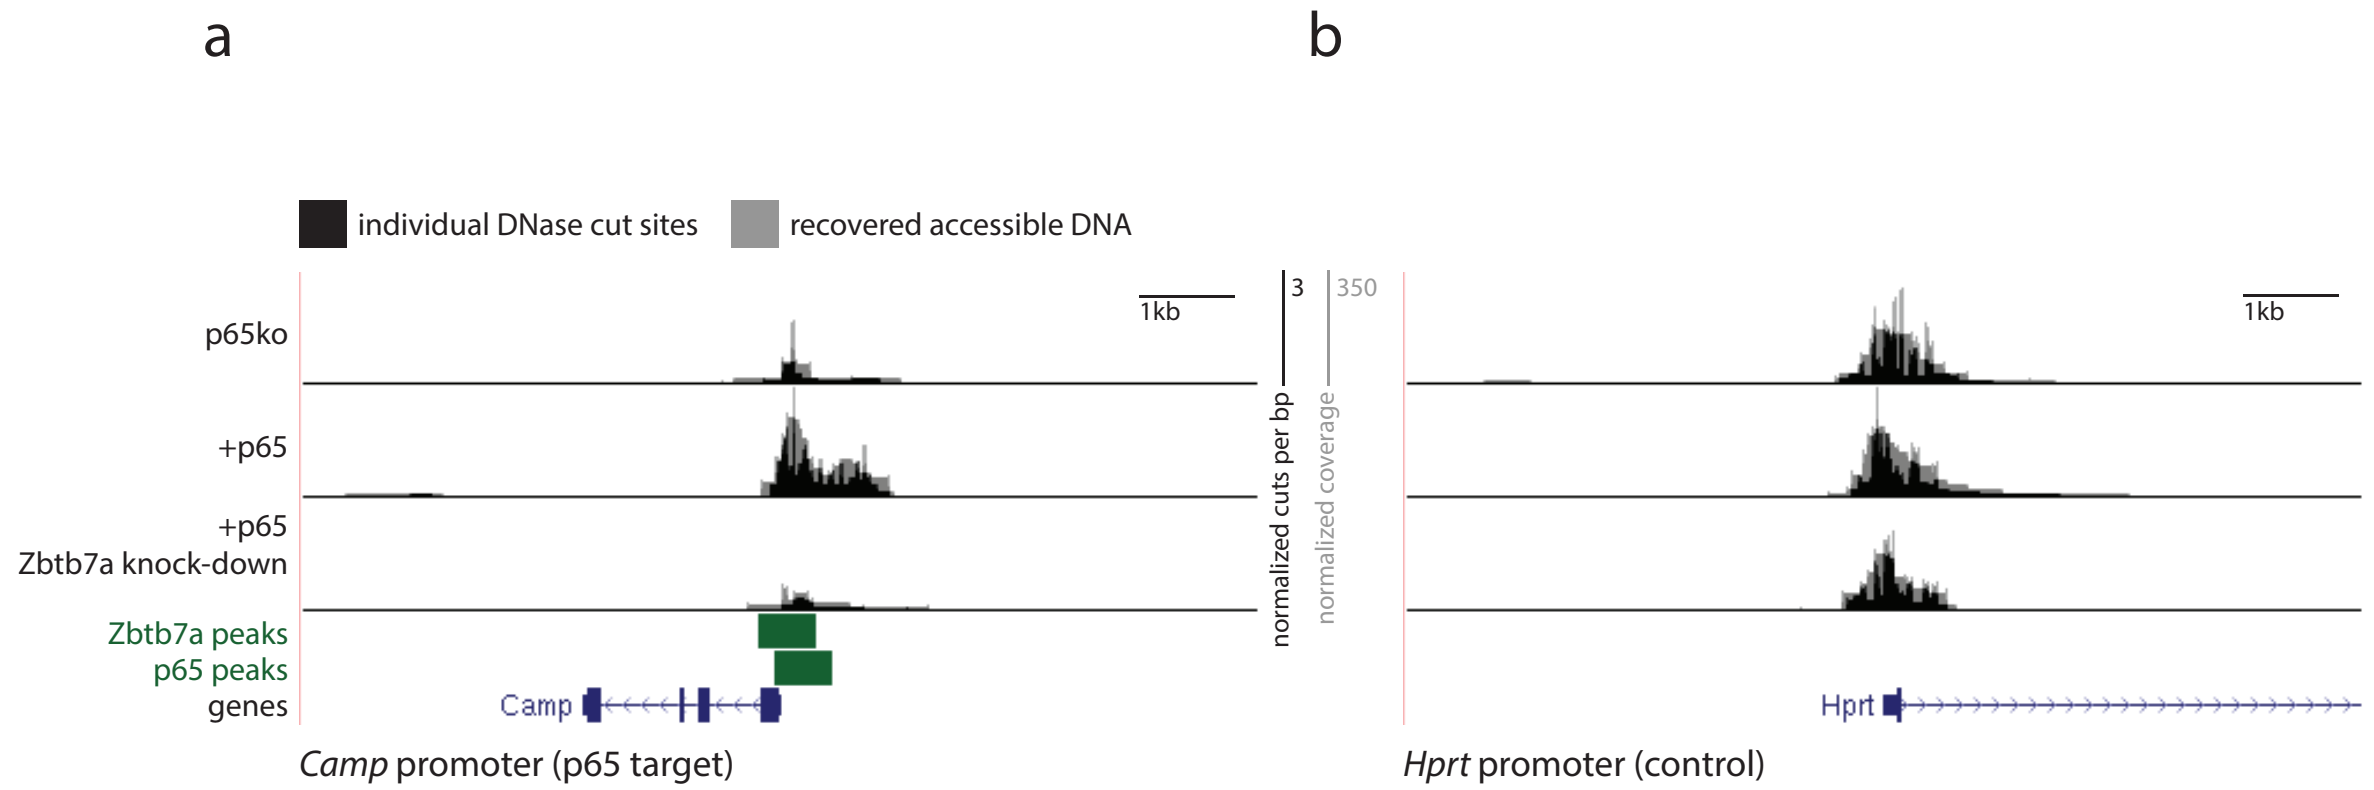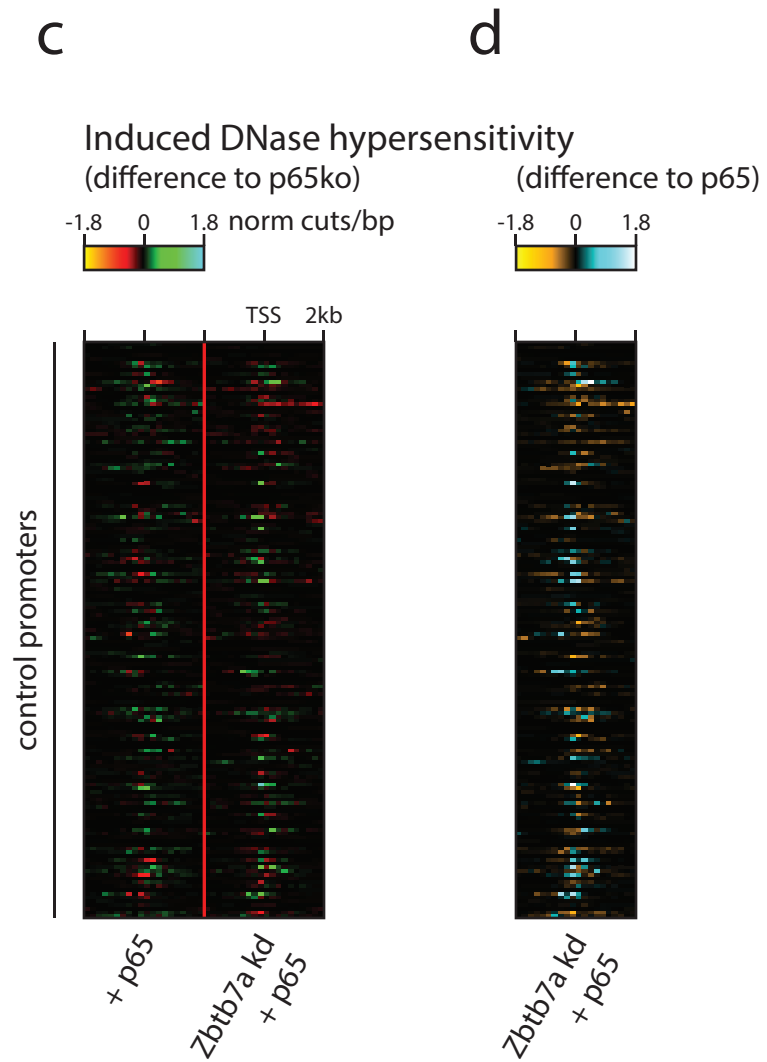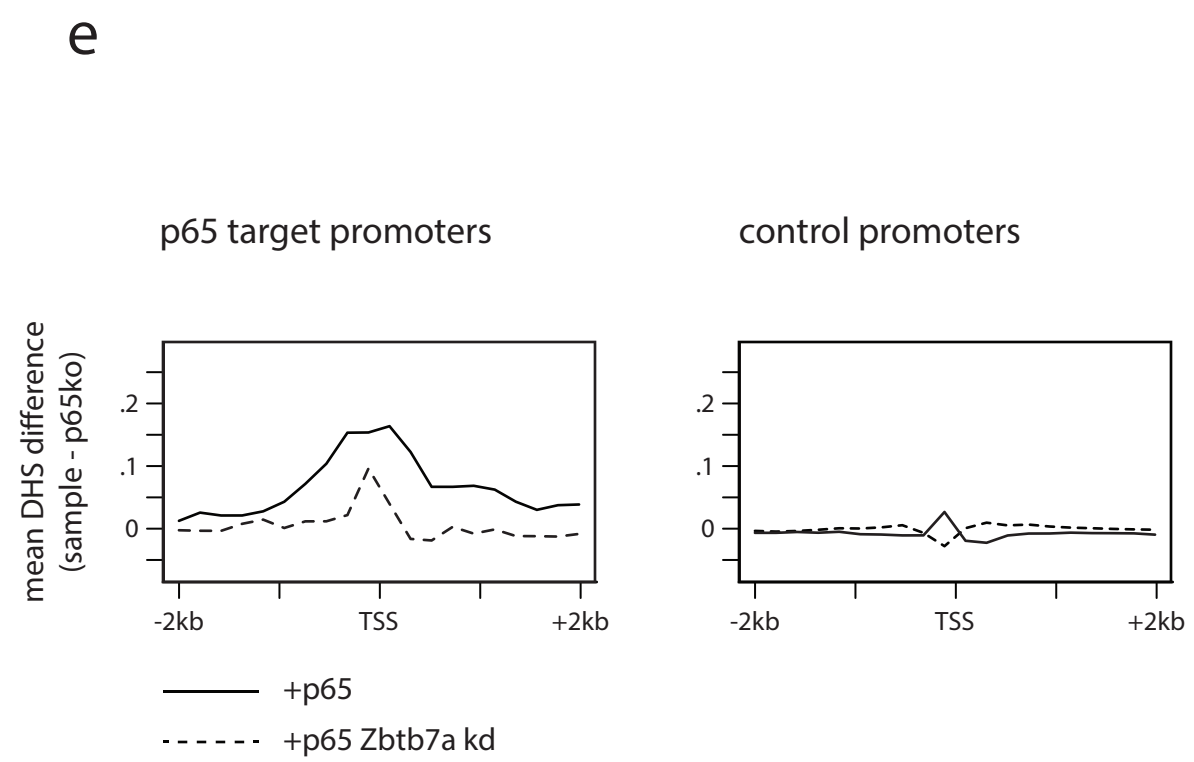

Supplement: pbio.2004526.s009.pdf [file pbio.2004526.s009.pdf]
