# Supplementary material for: Zbtb7a is a transducer for the control of promoter accessibility by NF-kappa B and multiple other transcription factors
Source: PubMed Central journal article supplement (PMC5993293; doi:10.1371/journal.pbio.2004526), 2018-05-29
Supplement: pbio.2004526.s010.pdf [file pbio.2004526.s010.pdf]

## **Zbtb7a is a transducer for the control of promoter accessibility by NF-kappa B and multiple other transcription factors**

José Miguel Ramos Pittol, Agata Oruba, Gerhard Mittler, Simona Sacconi and Dominic van Essen

### Statistical analysis & annotation of main & supporting figures

Sample sizes in all experiments were not selected to detect any pre-specified effect size(s). All samples were included in analyses unless otherwise specified.

#### Fig 1

1B - Experiments shown are representative of 3 experiments using independently grown cell cultures; error bars indicate s.e.m of replicate transfections within each experiment (sample size=3). Significances of reporter expression levels driven by p65 variants vs untransduced p65ko cells: NFkB motifs only +p65 TA1&2  $p=3.6 \times 10^{-6}$ , +p65 TA3  $p=0.54$  (two-tailed Student's t-test without assumption of equal variance).

1C - The results shown are representative of more than 5 experiments using independently grown cell cultures, with similar results.

1D - Significances of induced DHS differences: TA3-responsive promoters vs control promoters +p65  $p=9.4 \times 10^{-24}$ , +p65 TA3  $3.8 \times 10^{-24}$  (two-tailed Mann-Whitney u-test; no assumption of equal distribution or variance).

1E - Experiments shown are representative of 3 experiments using independently grown cell cultures; error bars indicate s.e.m of replicate transfections within each experiment (sample size=3). Significances of reporter expression levels driven by p65 variants vs untransduced p65ko cells: *Cxcl2* promoter +p65 TA1&2  $p=5.2 \times 10^{-13}$ , +p65 TA3  $p=9.6 \times 10^{-8}$ ; *Saa3* promoter +p65 TA1&2  $p < 10^{-15}$ , +p65 TA3  $p < 10^{-15}$  (two-tailed Student's t-test without assumption of equal variance).

1F - The results shown are representative of more than 5 experiments using independently grown cell cultures, with similar results; error bars indicate s.e.m of replicate quantitative PCRs within one experiment (sample size=3).

1H - The indicated 'combined SILAC ratio' is the mean SILAC ratio for each protein detected in two independent SILAC pull-down experiments, in which 'heavy' and 'light' labelled nuclear extracts were exchanged for each bait protein (considered as 'forward' and 'reverse' pull-downs). Ratios of proteins detected in only one pull-down direction were not considered (since these may be affected by differences in nuclear extract preparation). Mean unique peptides detected for each protein: 10.9 (sd 13.8) forward, 11.6 (sd 15.6) reverse. Significance of Zbtb7a SILAC ratio (after transformation of all less-extreme ratios to normal distribution)  $p=1.7 \times 10^{-3}$ .

1I - Pull-down blots were performed in 2 independent experiments, with similar results.

1J - The results shown are representative of 4 independent BiFC experiments, with similar results; error bars indicate s.e.m of replicate transfections within one experiment (sample size=3).

1K - The results shown are representative of more than 5 experiments using independently grown cell cultures, with similar results.

#### Fig 2

Zbtb7a ChIP-seq was performed on a total of 9 samples in 2 separate experiments using independently grown cell cultures, all with similar results: coverage across all

predicted Zbtb7a peaks was highly correlated between all datasets (mean Pearson's  $r = 0.92$  for all pairwise comparisons [range 0.86-0.95]).

2C - Zbtb7a peaks analysed  $n=12861$ , promoters  $n=23270$ , enhancers (identified as H3K4me1 peaks in fibroblasts)  $n=81778$ . Enrichments of promoters and enhancers among Zbtb7a peaks are both significant with  $p < 10^{-1000}$  (two-tailed binomial test).

2D - Group sizes for data analysis: all promoter regions  $n=23270$ , p65 target promoter regions  $n=153$ . Enrichments of Zbtb7a peaks associated with all promoter regions, and with p65 target promoter regions, are both significant with  $p < 10^{-1000}$  (two-tailed binomial test).

2E - Group sizes for data analysis: all Zbtb7a peaks  $n=10743$ , Zbtb7a promoter peaks  $n=5278$ . P-values for motif enrichment were calculated using the Homer software package, based on an expected binomial distribution of motifs within background sequences matched for mono-, di- and tri-nucleotide content.

2F - Number of promoters with overlapping Zbtb7a peak: non-expressed genes (fpm=0)  $n=253$  (out of 8393), very low expressed genes ( $0 < \text{fpm} < 0.001$ )  $n=281$  (out of 1197), expressed genes ( $0.001 \leq \text{fpm} < 1$ )  $n=776$  (out of 5062), expressed genes ( $1 \leq \text{fpm} < 20$ )  $n=2902$  (out of 8245), highly expressed genes ( $20 \leq \text{fpm}$ )  $n=1134$  (out of 2984). Number of Zbtb7a-negative promoters analysed  $n=7984$ .

2G - Group sizes for data analysis: GO-annotated promoters  $n=24203$ , Zbtb7a-peak annotated promoters  $n=5770$ , Zbtb7a-up annotated promoters  $n=330$ , Zbtb7a-down annotated promoters  $n=299$ , total GO annotation terms of all promoters  $n=16613$ . Significantly enriched GO terms are calculated using two-tailed binomial tests with Holm-Bonferroni correction for multiple testing. Corrected q-values: cell migration (GO:0016477)  $q=8.4 \times 10^{-11}$ ; positive reg. of cell proliferation (GO:0008284)  $q=9.8 \times 10^{-8}$ ; negative reg. of transcription (GO:0045892)  $q < 10^{-12}$ ; protein phosphorylation (GO:0006468)  $q < 10^{-12}$ ; signal transduction (GO:0035556)  $q=3.8 \times 10^{-10}$ ; positive reg. of transcription (GO:0045893)  $q < 10^{-12}$ ; negative reg. of cell proliferation (GO:0008285)  $q < 10^{-12}$ ; chromatin modification (GO:0016568)  $q=2.9 \times 10^{-8}$ ; inflammatory response (GO:0006954)  $q=1.4 \times 10^{-4}$ ; apoptotic process (GO:0006915)  $q=1.9 \times 10^{-11}$ ; multicellular organismal development (GO:0007275)  $q=7.4 \times 10^{-7}$ ; response to DNA damage stimulus (GO:0006974)  $q=5.3 \times 10^{-7}$ .

### Fig 3

DHS-seq was performed in 2 separate experiments using independently grown cell cultures, with similar results.

3E - Significance of enrichment for Zbtb7a-regulated accessibility among promoters associated with Zbtb7a peaks, compared to Zbtb7a-negative promoters:  $p=1.2 \times 10^{-957}$  (two-tailed binomial test).

3F - Significance of enrichment for Zbtb7a-regulated accessibility among enhancers associated with Zbtb7a peaks, compared to Zbtb7a-negative enhancers:  $p=4.8 \times 10^{-294}$  (two-tailed binomial test).

3G - Significance of enrichment for Zbtb7a-regulated accessibility among TA3-responsive p65 target promoters, compared to Zbtb7a-negative promoters:  $p=2.1 \times 10^{-39}$  (two-tailed binomial test).

### Fig 4

4A - *De novo* motif enrichment analysis surrounding Zbtb7a peaks was performed independently using either nucleotide-content-matched random background regions or CpG-island (CGI)-containing regions (to control for the enrichment of CGIs at Zbtb7a peaks); the motifs shown in Fig 4A (or closely-matching motifs) were identified in both analyses. P-values for motif enrichment were calculated using the

Homer software package, based on an expected binomial distribution of motifs within background sequences.

4C - Group sizes for data analysis: all promoters n=27946; Runx2-, cJun- Tead2- & Cepbd targets n=200 each; p65 direct targets n=153. Significances of enrichment for promoters with Zbtb7a-regulated accessibility are corrected for multiple testing of TF family members where applicable: Runx2 q=1.4x10<sup>-6</sup>, cJun p=1.4x10<sup>-6</sup>, Tead2 q=2.3x10<sup>-11</sup>, Cepbd q=1.7x10<sup>-8</sup>, p65 p=1.9x10<sup>-29</sup> (two-tailed binomial test with Bonferroni correction).

4D - Microarray analysis of Zbtb7a knock-down cells was performed on 2 independent sets of shRNA-transduced cells. Group sizes for data analysis: control genes with Zbtb7a-regulated accessibility n=400; Runx2-, cJun- Tead2- & Cepbd targets n=200 each; p65 direct targets n=52. Significances of mRNA expression differences vs control genes: Runx2 targets p=8.9x10<sup>-3</sup>; cJun targets p=2.3x10<sup>-7</sup>; Tead2 targets p=9.7x10<sup>-11</sup>; Cepbd targets p=4.9x10<sup>-6</sup>; p65 targets p=1.8x10<sup>-14</sup> (two-tailed Mann-Whitney u-test; no assumption of equal distribution or variance).

#### Fig 5

5A - Microarray analysis was performed on 3 independent sets of transduced cells for each experimental condition. Gene group sizes for data analysis: p65 target promoters n=153; TA3-responsive genes n=73; non-TA3-responsive genes n=80; matched control genes n=7189.

5B - Significances of Zbtb7a-dependence of TA3-responsive genes vs control genes: p=3.0x10<sup>-14</sup> (two-tailed Mann-Whitney u-test; no assumption of equal distribution or variance).

5C - The experiment shown is representative of 2 experiments using independently grown cell cultures; error bars indicate s.e.m of replicate transfections within each experiment (sample size=3). Significances of reporter expression levels driven by Gal4DBD-TA3 vs Gal4DBD: wt fibroblasts p=8.1x10<sup>-7</sup>, Zbtb7a-knockout fibroblasts not significant (p=0.23) (two-tailed Student's t-test without assumption of equal variance).

5E - Significances of DHS differences at non TA3-responsive promoters: +p65 TA3 vs Zbtb7a kd p=4.7x10<sup>-2</sup>, vs control promoters p=1.5x10<sup>-2</sup> (two-tailed Mann-Whitney u-test; no assumption of equal distribution or variance).

5F - DHS-seq using the mutant form of TA3 was performed in 2 separate experiments using independently grown cell cultures, with similar results.

#### Fig 6

6A - Zbtb7a ChIP-seq was performed on a total of 9 samples in 2 separate experiments (including 3 samples in p65-knockout fibroblasts) using independently grown cell cultures, all with similar results. Zbtb7a ChIP coverage is less than 2-fold changed in p65-knockout cells at 147 of 153 NFkB target promoters in untreated cells (> 2-fold Zbtb7a loss at 4 promoters, gain at 2 promoters); and at 150 NFkB target promoters in TNF- $\alpha$ -treated cells (>2-fold loss at 1 promoter, gain at 2 promoters).

6B - p65 ChIP-seq was performed on a total of 9 samples in 3 separate experiments (including 2 samples in Zbtb7a-knockout fibroblasts) using independently grown cell cultures, with similar results. p65 ChIP coverage is less than 2-fold changed in Zbtb7a-knockout cells at 141 of 153 NFkB target promoters in untreated cells (> 2-fold p65 loss at 1 promoter, gain at 11 promoters); and at 135 NFkB target promoters in TNF- $\alpha$ -treated cells (>2-fold loss at 10 promoters, gain at 8 promoters).

6E - Significances of induced DHS differences at p65 target promoters +p65 vs Zbtb7a kd +p65:  $p=2.4 \times 10^{-8}$ ; at p65 target promoters vs control promoters:  $p=1.5 \times 10^{-38}$  (two-tailed Mann-Whitney u-test; no assumption of equal distribution or variance).

6F - Significances of induced DHS differences at p65-binding enhancers +p65 vs Zbtb7a kd +p65:  $p=3.6 \times 10^{-36}$ , at p65-binding enhancers vs control enhancers:  $p=1.1 \times 10^{-134}$  (two-tailed Mann-Whitney u-test; no assumption of equal distribution or variance).

6G - Significances of differences vs control genes: TA3-responsive +p65  $p=1.6 \times 10^{-26}$ ; non-TA3-responsive +p65  $p=3.6 \times 10^{-38}$  (two-tailed Mann-Whitney u-test; no assumption of equal distribution or variance).

6H - Significances of TA3-dependence of gene expression levels for each group: TA3-responsive vs control genes  $p=2.3 \times 10^{-12}$ , non-TA3-responsive vs control genes  $p=1.0 \times 10^{-4}$ , TA3-responsive vs non-TA3-responsive genes  $p=1.3 \times 10^{-3}$  (two-tailed Mann-Whitney u-test; no assumption of equal distribution or variance). TA3-dependent genes (defined as those with log2 Affymetrix expression scores p65 - p65 TA1&2 > 0.8) within each group: all p65 targets 50/153 (32%), TA3-responsive genes 36/73 (49%), non-TA3-responsive genes 14/80 (17%), control genes 67/7189 (0.9%); significance of TA3-responsive vs non-TA3-responsive  $p=5.9 \times 10^{-5}$  (chi-squared test on 2x2 table;  $\chi^2=16.1$ , degrees of freedom=1).

#### Fig S1

S1D-F - The results shown are representative of 2 (d,e) or 3 (f) experiments using independently grown cell cultures; error bars indicate s.e.m of replicate transfections within each experiment (sample size=3).

S1J - The results shown are representative of 4 (mouse cells; including experiment in Fig 6C) or 2 (human cells) experiments using independently grown cell cultures; error bars indicate s.e.m of replicate transfections within each experiment (sample size=3). Significances of reporter expression levels driven by Gal4DBD-TA3 vs Gal4DBD: mouse fibroblasts  $p=6.7 \times 10^{-54}$ , human HEK-293 cells  $2.8 \times 10^{-261}$  (two-tailed Student's t-test without assumption of equal variance).

S1L - The results shown are representative of 2 independent immunoprecipitation experiments, with similar results.

S1M - The results shown are representative of 3 independent BiFC experiments, with similar results; error bars indicate s.e.m of replicate transfections (sample size=3).

S1N - The results shown are representative of 2 independent pull-down experiments, with similar results.

S1O - The results shown are representative of more than 5 experiments using independently grown cell cultures, with similar results.

#### Fig S2

S2G - Group sizes for data analysis: p65 promoter peaks  $n=6055$ , Zbtb7a promoter peaks  $n=7363$ , encode ChIP-seq promoter peaks  $n=55-10141$  (mean 3168, sd 2823).

S2H - CGIs  $n=16026$ . Enrichment of Zbtb7a peaks associated with CGIs are significant with  $p < 10^{-1000}$  (two-tailed binomial test).

S2I - Group sizes for data analysis: all promoters  $n=28941$ , Zb-positive promoters  $n=4799$ . Significances of elevated GC content among Zbtb7a-positive promoters  $p \approx 10^{-1026}$ , and of observed/expected CG ratios among Zbtb7a-positive promoters

$p \approx 10^{-818}$  (two-tailed Mann-Whitney u-test; no assumption of equal distribution or variance).

S2J - Group sizes for data analysis: Zbtb7a CGI promoter peaks  $n=3575$ , Zbtb7a non-CGI promoter peaks  $n=1145$ , Zbtb7a CGI enhancer peaks  $n=224$ , Zbtb7a non-CGI enhancer peaks  $n=1811$ . P-values for motif enrichment were calculated using the Homer software package, based on an expected binomial distribution of motifs within background sequences matched for mono-, di- and tri-nucleotide content either selected randomly (for non-CGI peaks) or within CGIs (for CGI peaks).

S2M - Significantly enriched GO terms are calculated using two-tailed binomial tests with Holm-Bonferroni correction for multiple testing. Corrected q-values: integrin signaling (GO:0007229)  $q=3.1 \times 10^{-5}$ ; TM receptor tyrosine kinase activity (GO:0007169)  $q=5.0 \times 10^{-4}$ ; TGF-beta signaling (GO:0007179)  $q=1.3 \times 10^{-7}$ ; positive regulation of ERK1 & ERK2 cascade (GO:0070374)  $q=2.0 \times 10^{-2}$ ; Wnt signaling (GO:0016055)  $q=2.4 \times 10^{-9}$ ; insulin receptor signaling (GO:0008286)  $q=1.2 \times 10^{-3}$ ; LPS response (GO:0071222)  $q=3.2 \times 10^{-6}$ ; smoothed signaling (GO:0007224)  $q=9.6 \times 10^{-3}$ ; inflammatory response (GO:0006954)  $q=1.4 \times 10^{-4}$ ; small GTPase signal transduction (GO:0007264)  $q=3.6 \times 10^{-3}$ ; response to DNA damage stimulus (GO:0006974)  $q=5.3 \times 10^{-7}$ ; innate immune response (GO:0045087)  $q=2.4 \times 10^{-2}$ .

### Fig S3

S3B,C - The results shown are representative of 3 knock-down experiments with both hairpins, each using independently grown cell cultures, with similar results. Error bars in panel b indicate s.e.m of replicate transductions within one experiment (sample size=3).

S3D - The results shown are representative of more than 5 knock-down experiments using independently grown cell cultures, with similar results. Error bar indicates s.e.m. of mRNA levels relative to those of control cells of replicate quantitative PCRs.

S3K - Number of promoters with overlapping Zbtb7a peak with accessibility *not* Zbtb7a-regulated  $n=3591$ , with Zbtb7a-driven increased accessibility  $n=214$ , with Zbtb7a-driven reduced accessibility  $n=246$ .

S3M - Number of analysed footprints within Zbtb7a-dependent sites and significances of differences in footprint magnitudes between control and Zbtb7a knockdown cells: Nf1  $n=395$ ,  $p=4.0 \times 10^{-53}$ ; HoxC9  $n=66$ ,  $p=1.5 \times 10^{-4}$ ; Klf4  $n=134$ ,  $p=3.8 \times 10^{-3}$ ; CTCF  $n=52$ ,  $p=6.1 \times 10^{-4}$ ; AP1  $n=1008$ ,  $6.0 \times 10^{-24}$ ; AP2g  $n=289$ ,  $p=2.5 \times 10^{-7}$ ; Foxo1  $n=322$ ,  $p=3.7 \times 10^{-11}$ ; Tead  $n=175$ , not significant ( $p=0.06$ ); Cebpb  $n=198$ ,  $p=2.1 \times 10^{-3}$ ; Rbpj  $n=320$ ,  $p=0.02$ ; cJun-CRE  $n=201$ , not significant ( $p=0.41$ ); Ets1  $n=226$ , not significant ( $p=0.06$ ); Stat4  $n=385$ , not significant ( $p=0.31$ ).

S3N,O - The results shown are representative of 2 independent ChIP experiments for each transcription factor, with similar results.

### Fig S4

S4B,C - Number of analysed Zbtb7a-negative promoters  $n=16789$ , Zbtb7a-associated promoters with gene expression *not* Zbtb7a-regulated  $n=639$ , with Zbtb7a-driven increased expression  $n=304$ , with Zbtb7a-driven reduced expression  $n=273$ .

S4C - Significances of Zbtb7a-dependent DHS differences at Zbtb7a-negative promoters vs promoters with Zbtb7a-driven increased expression:  $p=1.3 \times 10^{-56}$ , Zbtb7a-driven reduced expression  $p=7.3 \times 10^{-72}$  (two-tailed Mann-Whitney u-test; no assumption of equal distribution or variance).

S4F - Number of Zbtb7a-associated promoters with Zbtb7a-dependent gene expression  $n=629$  (total)  $n=158, 156, 157, 158$  (Q1, Q2, Q3, Q4). Significance of difference in Zbtb7a-dependence of DHS between least (Q1) and most (Q4) Zbtb7a-dependent promoters  $p=2.3 \times 10^{-14}$ ; for Zbtb7a-independent promoters vs Q1  $p=4.9 \times 10^{-4}$ ; Q2  $p=4.1 \times 10^{-5}$ ; Q3  $p=1.4 \times 10^{-11}$ ; Q4  $p=2.5 \times 10^{-28}$  (two-tailed Mann-Whitney u-test; no assumption of equal distribution or variance).

#### Fig S5

S5A-G - The results shown are representative of 3 experiments using separate cell lines with independently-restored Zbtb7a expression, with similar results. Error bars indicate s.e.m. of replicate samples within one experiment ( $n=3$ ). Significances of mRNA expression levels in Zbtb7a-knockout cells with vs without restoration of Zbtb7a: *Cd82*  $p=9.0 \times 10^{-5}$ ; 2 *Ebf1*  $p=1.8 \times 10^{-5}$ ; *Plau*  $p=7.4 \times 10^{-5}$ ; *Col4a2*  $p=4.6 \times 10^{-3}$ ; *Mustn1*  $p=5.2 \times 10^{-4}$ ; *Postn*  $p=1.6 \times 10^{-6}$ ; *Hp*  $p=1.7 \times 10^{-7}$ ; *Wisp2*  $p=2.0 \times 10^{-4}$ ; *Gsta4*  $p=2.6 \times 10^{-4}$ ; *Glrx*  $p=1.9 \times 10^{-4}$ ; *Xdh*  $p=5.8 \times 10^{-5}$ ; *Ptx3*  $p=9.0 \times 10^{-4}$ ; *Cxcl2*  $p=2.1 \times 10^{-2}$ ; *C3*  $p=8.5 \times 10^{-5}$ ; *Gem*  $p=1.1 \times 10^{-3}$  (two-tailed Student's t-test without assumption of equal variance).

#### Fig S6

S6C,D - DHS-seq using the mutant form of TA3 was performed in 2 separate experiments using independently grown cell cultures, with similar results.

S6E - Significances of induced DHS differences at p65 target promoters +p65 TA3 vs +p65 TA3 mutant:  $p=7.5 \times 10^{-3}$  (two-tailed Mann-Whitney u-test; no assumption of equal distribution or variance).

S6F - The results shown are representative of 3 independent experiments with similar results; error bars indicate s.e.m of replicate transfections. Significances of TA3-driven reporter expression levels from *Saa3* promoter without mutation vs with disrupted Zbtb7a motif:  $p=2.5 \times 10^{-2}$  (two-tailed Student's t-test without assumption of equal variance).

S6G - The results shown are representative of 2 independent experiments with similar results; error bars indicate s.e.m of replicate transfections. Significances of *Gem* promoter reporter expression levels in cells co-transfected with Gal4DBD vs Gal4DBD-Zbtb7a: p65-knockout cells not significant ( $p=0.16$ ), +p65 minimal TA3  $p=5.4 \times 10^{-3}$  (two-tailed Student's t-test without assumption of equal variance).
